# Supplementary material for: Attention‐deficit/hyperactivity disorder symptoms and dietary habits in adulthood: A large population‐based twin study in Sweden
Source: PubMed Central journal article supplement (PMC7702140; doi:10.1002/ajmg.b.32825), 2020-10-07
Supplement: AJMG-183-475-s002.pdf [file AJMG-183-475-s002.pdf]

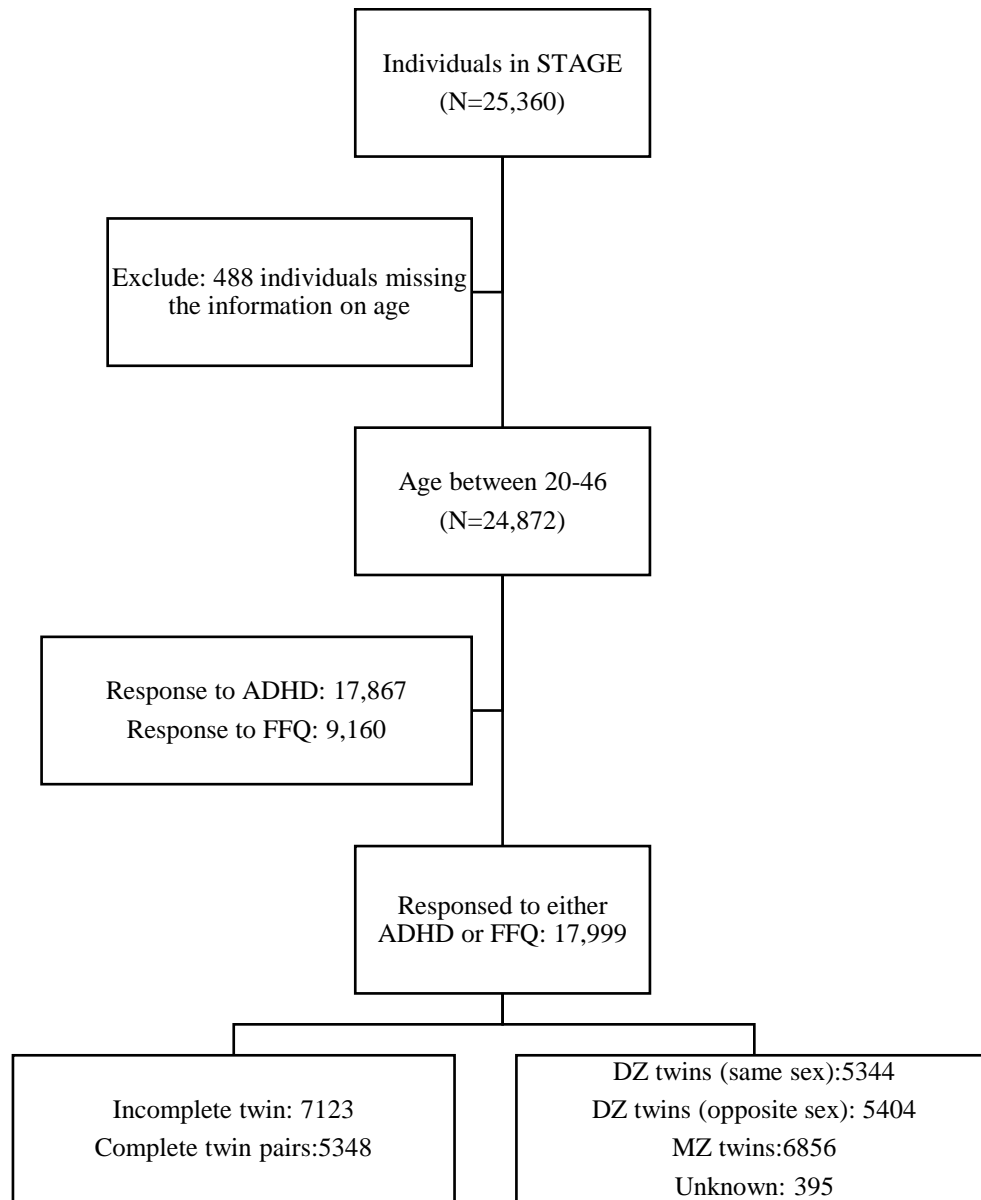

**Figure S1.** Flow diagram for study participants
